# Supplementary material
Source: Springer Nature journal article supplement (https://www.springermedizin.de/resource/supplementary/40248_2014_201_MOESM2_ESM.pdf/9686224)
Supplement: MOESM2 [file 9686224]

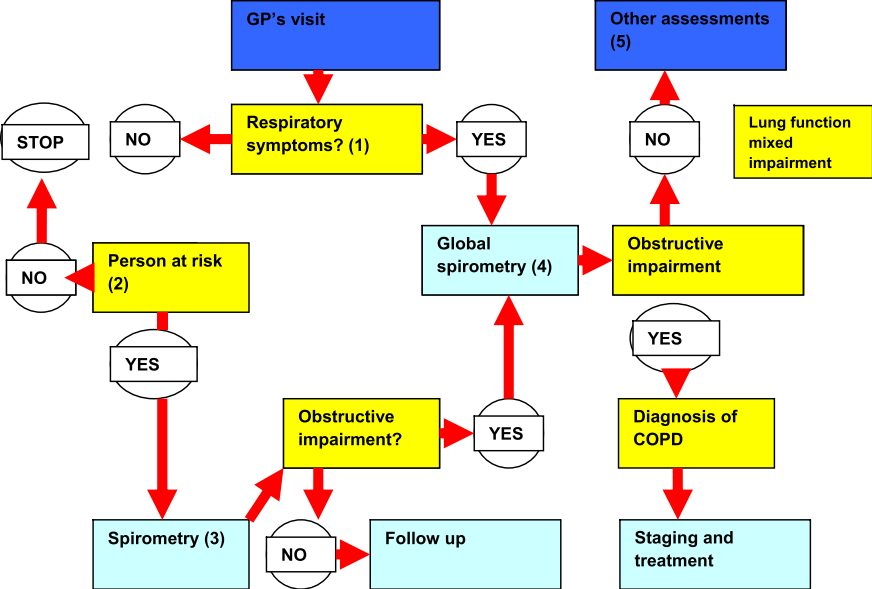

- (1) Active search for symptoms even by *ad hoc* questionnaires every year or every other year if there is risk;
- (2) Use of risk charts of CNR-ISS;
- (3) Spirometry;
- (4) Global spirometry (with assessment of residual volume);
- (5) Regarding other respiratory diseases or other systems.
